# Supplementary material for: Resilience amid conflict: A qualitative study of perspectives on the provision of and experience with Sexual and Reproductive health services during war
Source: Research Square preprint supplement (doi:10.21203/rs.3.rs-8559503/v1), 2026-02-12
Supplement: Supplementary file 1 [file 2b880a6dedfdfd74e0d2556c.docx]

**Supplementary File 1: Data collection tools**

**A. Key informant interview guide**

1. Please tell me a little bit about your [organization, company, unit, department], the nature of the work you do, and how this work relates to the provision of family planning, contraceptive services, and sexual reproductive services and education in Lebanon

1.a. Probe on the current contraceptive and family planning services provided

1.b. Probe on any embedded mental health components within these services

1.c. Probe on the ways has the work changed in the [organization, company, unit, department] in order to adapt to the need of the community

2. From your perspective, what are the significant gaps in the implementation of quality contraceptive and family planning services and sexual reproductive services and education in your [organization, company, unit, department] and in Lebanon?

2.a. Probe on the challenges and shortcomings

2.b. Probe on the key barriers faced by service providers in delivering effective family planning services and sexuality education

2.c. Probe on socio-cultural, economic or institutional barriers that impact service provision

3. In contrast, can you identify any facilitators or positive factors that contribute to the successful implementation of family planning, contraceptive services, and sexual reproductive services and education in Lebanon?

3.a. Probe on specific strategies or practices that have proven effective in overcoming challenges

3.b. Probe on lessons learned from your successful interventions that could be applied in this context

4. What steps can be taken to enhance the accessibility of family planning, contraceptive services, and sexual reproductive services and education for marginalized or vulnerable populations in Lebanon?

4.a. Probe on how interventions that can ensure inclusivity and address potential barriers to access

4.b. Probe on recommendations for integrating mental health support within these services

4.c. Probe on how the intervention can foster a holistic approach that considers both the physical and mental well-being of service users

5. How do you think can technology or innovative approaches be leveraged to enhance user experience and engagement in the delivery of contraceptive services and family planning services and education?

5.a. Based on this, what are your key recommendations would you propose for improving the overall quality and effectiveness of contraceptive and family planning services in Lebanon?

Is there any additional information or perspective you would like to share regarding the topic?

**B. Focus group discussion guides**

**B.1 Focus group discussion guide – Men and Boys**

**Icebreaker Question**

Considering our discussion today revolves around experiences with sexual and reproductive health services, let’s start by sharing a moment when people like you felt well-supported or informed about your/their reproductive health. It could be a positive experience with a healthcare provider, a helpful resource you came across, or a conversation that left you feeling empowered.

**Care Pathways and Experiences**

1. Can you tell me more about your experiences of your peers/women/men in accessing sexual and reproductive health services, including contraceptive and family planning, in Lebanon?

1.a. Probe on the care pathways encountered and how they shaped your overall experience

1.b. Probe on ever seeking mental health services in conjunction with sexual and reproductive health services. What are general experiences about mental health services? Do you know of referrals between mental health services in conjunction with and sexual and reproductive health services? Are they provided together sometimes?

1.c. Probe on perception of the integration of mental health components within SRH services

**Barriers and Power Dynamics**

2. Can you tell us more about the barriers people you know who are similar to you in terms of age and gender face in accessing contraceptive and family planning, in Lebanon?

2.a. Probe on specific challenges

2.b. Probe on how they perceive the power dynamics between men, women and health care providers in the context of SRH services in PHCCs in Lebanon?

2.c. Probe on how have these incidents shaped your or your partner’s experiences with SRH services

**Technology and Innovative Approaches**

3. In your opinion, how can technology or innovative approaches be leveraged to enhance the experience and engagement in the delivery of contraceptive services and family planning education?

3.a. Probe on comfortability with the use of technology in accessing health information, including contraceptive services and family planning education

3.b. Probe on specific technologies or features you would like to see integrated into these services

Is there any additional information or perspective you would like to share regarding the topic?

**B.1 Focus group discussion guide – Women and Girls**

**Icebreaker Question:**

Considering our discussion today revolves around experiences with sexual and reproductive health services, let’s start by sharing a moment when you felt well-supported or informed about your reproductive health. It could be a positive experience with a healthcare provider, a helpful resource you came across, or a conversation that left you feeling empowered.

**Care Pathways and Experiences**

1. Can you tell me about the experiences of your peers/women/men in accessing sexual and reproductive health services, including contraceptive and family planning, in Lebanon?

1.a. Probe on the care pathways encountered, and how did they shape overall experience

2. What are general experiences about mental health services? Do you know of referrals between mental health services and sexual and reproductive health services? Are they provided together sometimes?

2.a. Probe on how they perceive the integration of mental health components within SRH services, and what has been your experience

**Barriers and Power Dynamics**

3. Can you tell us more about the barriers people you know who are similar to you in terms of age and gender face in accessing contraceptive and family planning, in Lebanon?

3.a. Probe on specific challenges

3.b. Probe on the power dynamics between women, adolescents, refugees, and health care providers in the context of SRH services in PHCCs in Lebanon

3.c. Probe on ever experiencing any gender-related challenges or disparities in accessing care and how these incidents shaped the experiences with SRH services

**Technology and Innovative Approaches**

4. In your opinion, how can technology or innovative approaches be leveraged to enhance the experience and engagement in the delivery of contraceptive services and family planning education?

4.a. Probe on comfortability with the use of technology in accessing health information, including contraceptive services and family planning education

4.b. Probe on preferred specific technologies or features to see integrated into these services

Is there any additional information or perspective you would like to share regarding the topic?
